# Supplementary material
Source: HighWire-hosted journal article supplement (http://d2538ggaoe6cji.cloudfront.net/highwire/filestream/39095/field_highwire_adjunct_files/0/132753-1.pdf)
Supplement: 132753-1.pdf [file 132753-1.pdf]

# Appendix A: Speed comparison for negative binomial GLMMs

*Mollie Brooks*

*2017-05-01*

These supplementary figures and tables present benchmarking that was done using the Salamander data that was analyzed in appendix A (Price et al. 2016; Price et al. 2015). We compare the timing of functions `glmmTMB`, `glmmadmb`, `glmer.nb`, `brm`, and `inla` (Skaug et al. 2012; Bates et al. 2015; Bürkner in press; Rue, Martino, and Chopin 2009). We used the defaults of each function. However, it would be possible to speed up `brm` by saving the compiled C++ file or using multiple computing cores; it would be possible to speed up `inla` by giving it access to more cores.

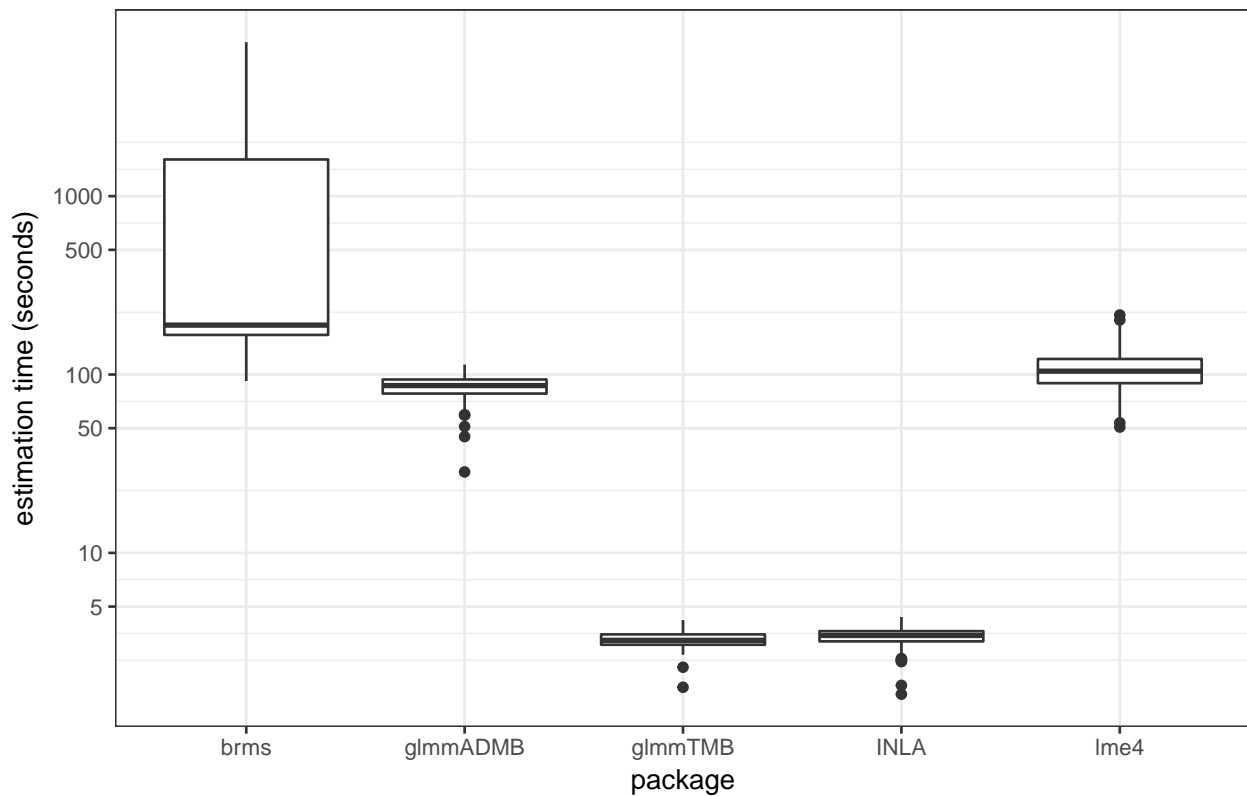

*Figure A.1* - Estimation times for fitting models to 100 simulated data sets using functions `glmmTMB`, `glmmadmb`, `glmer.nb`, `brm`, and `inla`. The estimated model was identical to the model used for simulation and can be represented as `glmmTMB(count ~ spp * mined + (1|site), Salamanders, family="nbinom2")`.

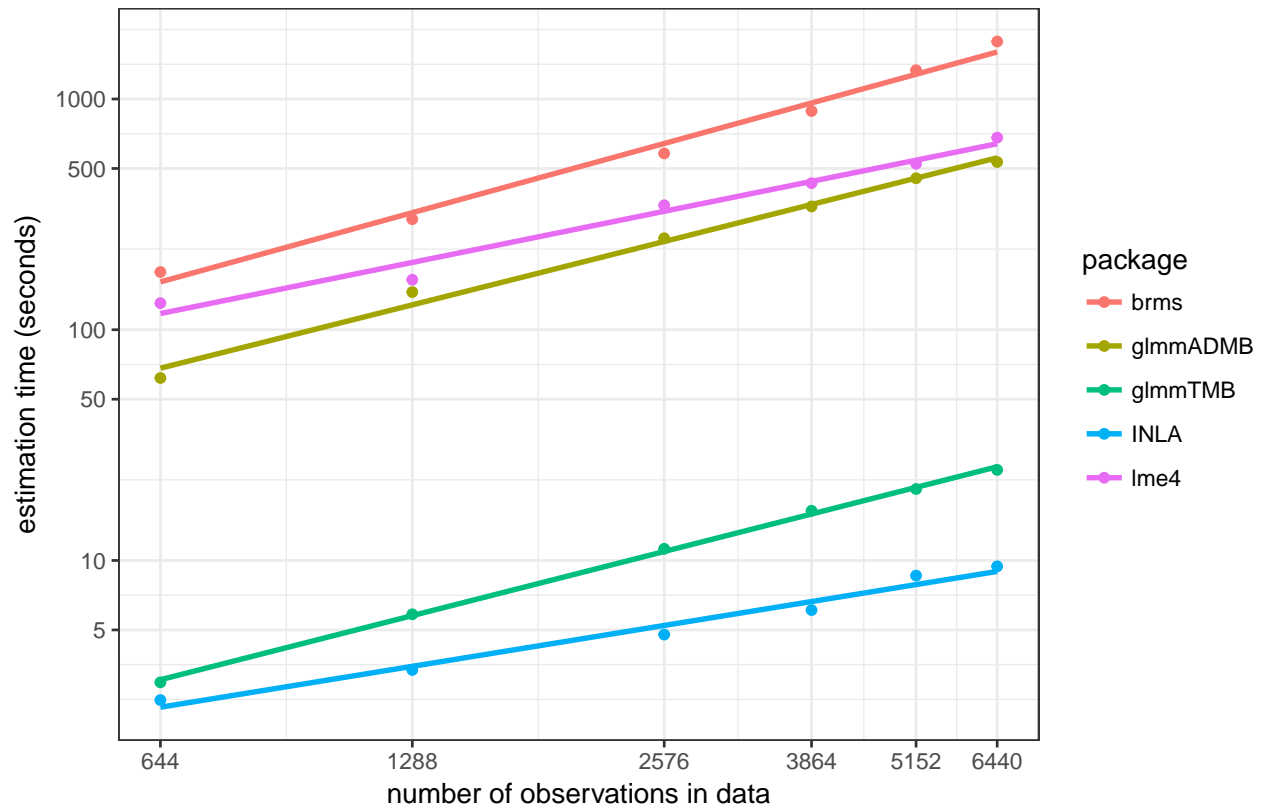

Figure A.2 - The Salamander data set was replicated by 1, 2, 4, 6, 8, and 10 times to create larger data sets. The time required to fit the same model using functions `glmmTMB`, `glmmadmb`, `glmer.nb`, `brm`, and `inla` was recorded. That model can be represented as `glmmTMB(count ~ spp * mined + (1|site), Salamanders, family="nbinom2")`. All models had the same number of parameters including random effect levels.

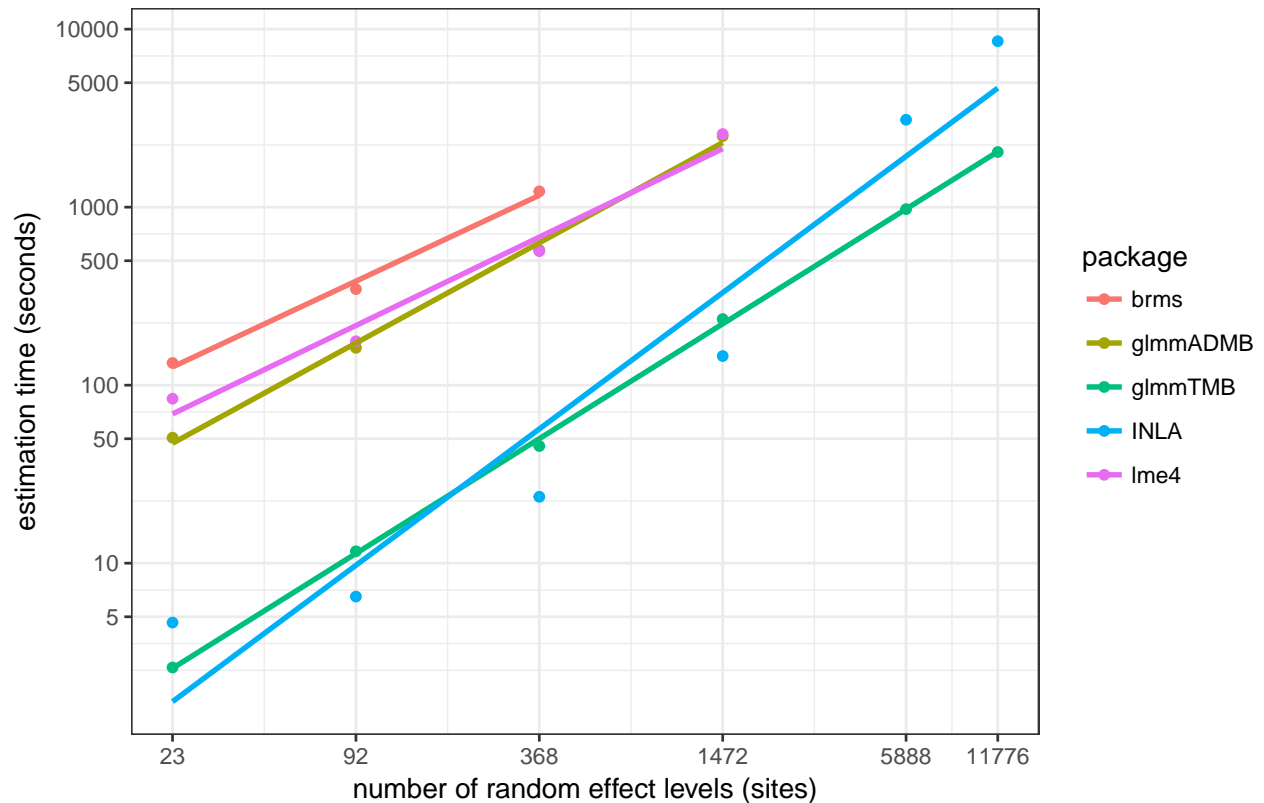

Figure A.3 - Data sets with increasing numbers of levels of the random effect were simulated based on the most parsimonious model fit to the salamander data, `glmmTMB(count ~ spp * mined + (1|site), Salamanders, family="nbinom2")`. The time required to fit the same model using functions `glmmTMB`, `glmmadmb`, `glmer.nb`, `brm`, and `inla` was recorded. Each simulated data set had the same number of observations per random effect level — the same ratio as in the original data.

## References

- Bates, Douglas, Martin Mächler, Benjamin M Bolker, and Steve Walker. 2015. “Fitting Linear Mixed-Effects Models Using lme4.” *Journal of Statistical Software* 67 (1): 1–48.
- Bürkner, Paul-Christian. in press. “brms: An R Package for Bayesian Multilevel Models Using Stan.” *Journal of Statistical Software*.
- Price, S J, B L Muncy, S J Bonner, A N Drayer, and C D Barton. 2015. “Data from: Effects of Mountaintop Removal Mining and Valley Filling on the Occupancy and Abundance of Stream Salamanders.” *Journal of Applied Ecology*. Dryad Digital Repository. doi:doi:10.5061/dryad.5m8f6.
- . 2016. “Effects of Mountaintop Removal Mining and Valley Filling on the Occupancy and Abundance of Stream Salamanders.” *Journal of Applied Ecology* 53 (2): 459–68. doi:10.1111/1365-2664.12585.
- Rue, Håvard, Sara Martino, and Nicolas Chopin. 2009. “Approximate Bayesian Inference for Latent Gaussian Models by Using Integrated Nested Laplace Approximations.” *Journal of the Royal Statistical Society: Series B (Statistical Methodology)* 71 (2). Wiley Online Library: 319–92.
- Skaug, H, D Fournier, A Nielsen, A Magnusson, and B M Bolker. 2012. *GlmmADMB: Generalized Linear Mixed Models Using AD Model Builder*.
